# Supplementary material for: Characterisation of the Cullin-3 mutation that causes a severe form of familial hypertension and hyperkalaemia
Source: PubMed Central journal article supplement (PMC4604684; doi:10.15252/emmm.201505444), 2015-08-18

1A

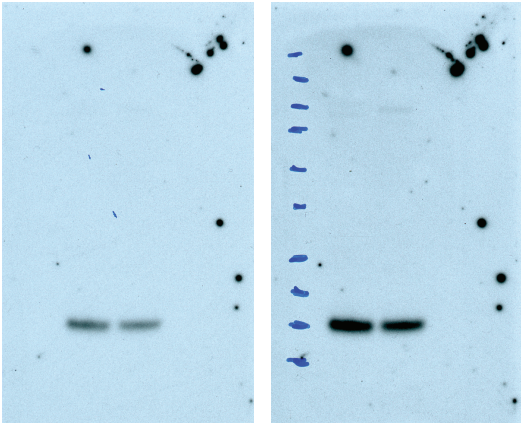

1C

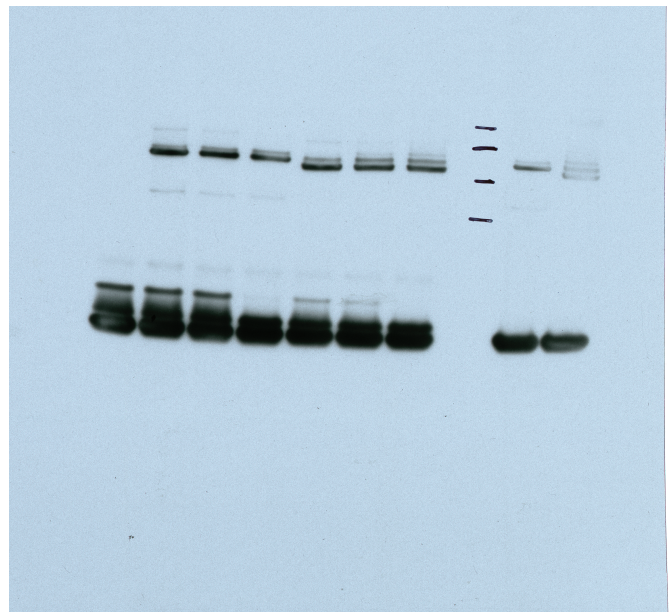

1F

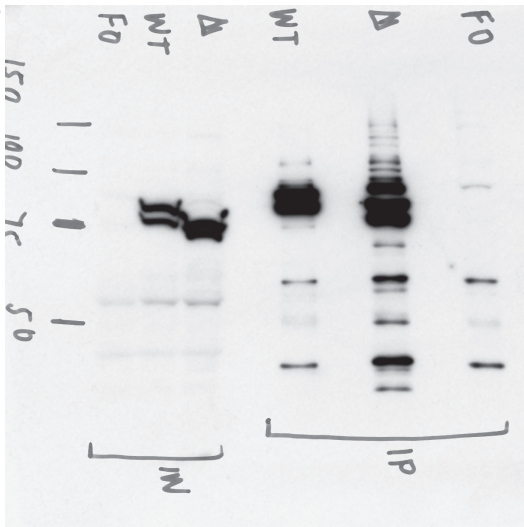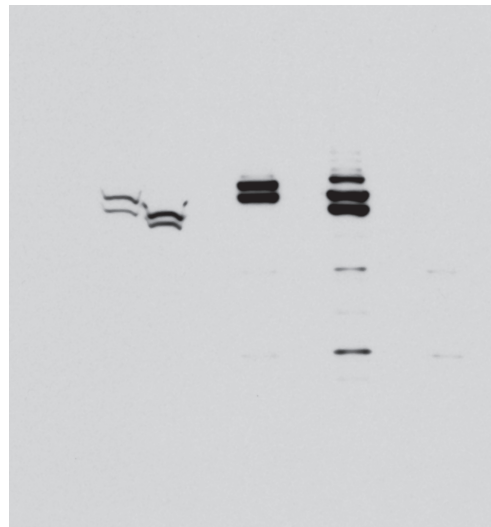

1G

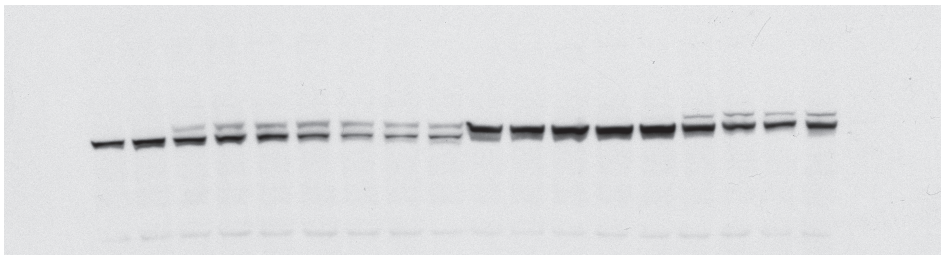

1HIP samples run out on gel, and then membrane cut and probed as shown  
All developed on same piece of film and cropped for figure.

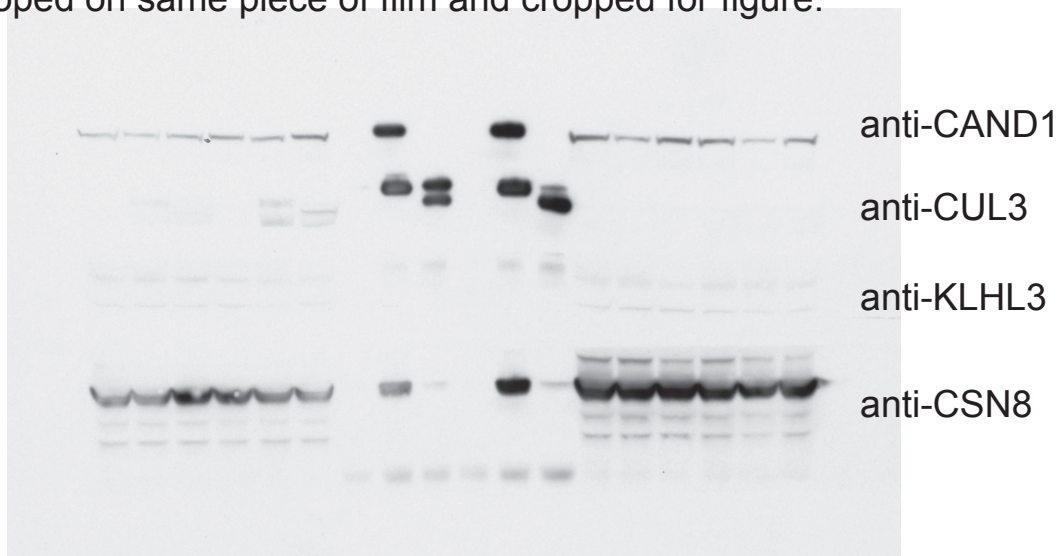

Supplement: emmm0007-1285-sd4.pdf [file emmm0007-1285-sd4.pdf]
