# Supplementary material for: Characterisation of the Cullin-3 mutation that causes a severe form of familial hypertension and hyperkalaemia
Source: PubMed Central journal article supplement (PMC4604684; doi:10.15252/emmm.201505444), 2015-08-18
Supplement: emmm0007-1285-sd6.pdf [file emmm0007-1285-sd6.pdf]

| 4C | Aldo level (pg/ml) |             |
|----|--------------------|-------------|
|    | Group              | WT Δ403-459 |
|    | 367                | 162         |
|    | 387                | 89          |
|    | 243                | 584         |
|    | 238                | 1037        |
|    | 234                | 813         |
|    | 305                | 265         |
|    | 115                | 174         |
|    | 150                | 659         |
|    | 395                | 155         |
|    | 158                | 786         |
|    | 213                | 510         |
|    | 374                | 244         |
|    | 619                | 228         |
|    | 281                | 452         |
|    | 166                | 244         |
|    | 536                | 347         |
|    | 191                | 1165        |
|    | 396                | 369         |
|    |                    | 328         |
|    |                    | 227         |
|    |                    | 851         |
|    |                    | 695         |
|    | <b>N</b>           | 18 22       |
|    | <b>mean</b>        | 298 472     |
|    | <b>sem</b>         | 33 67       |

| 4D | ISTAT Analyte |             | CI   |        |
|----|---------------|-------------|------|--------|
|    | Group         | WT Δ403-459 |      | WT     |
|    |               | 4.1         | 5.4  | 118    |
|    |               | 4.5         | 4.8  | 114    |
|    |               | 4.3         | 6.1  | 116    |
|    |               | 4.8         | 4.7  | 112    |
|    |               | 4.7         | 5    | 111    |
|    |               | 4.3         | 6.3  | 114    |
|    |               | 3.7         | 4.7  | 118    |
|    |               | 4.7         | 5.6  | 117    |
|    |               | 3.8         | 5.1  | 118    |
|    |               | 4.2         | 4.8  | 117    |
|    |               | 4.2         | 4.1  | 117    |
|    |               | 4.6         | 5.1  | 117    |
|    |               | 4.1         | 4.7  | 116    |
|    | <b>N</b>      | 13          | 13   | 13     |
|    | <b>mean</b>   | 4.31        | 5.11 | 115.77 |
|    | <b>sem</b>    | 0.10        | 0.18 | 0.67   |

| <b>Cl</b>       | <b>pH</b> | <b>pH</b>       | <b>PCO2</b> | <b>PCO2</b>     | <b>HCO3</b> | <b>HCO3</b>     | <b>BE</b> | <b>BE</b>       |
|-----------------|-----------|-----------------|-------------|-----------------|-------------|-----------------|-----------|-----------------|
| <b>Δ403-460</b> | <b>WT</b> | <b>Δ403-461</b> | <b>WT</b>   | <b>Δ403-462</b> | <b>WT</b>   | <b>Δ403-463</b> | <b>WT</b> | <b>Δ403-464</b> |
| 120             | 7.308     | 7.278           | 6.2         | 5.1             | 23.3        | 17.9            | -3        | -9              |
| 118             | 7.33      | 7.312           | 5.61        | 4.5             | 22.2        | 17.1            | -4        | -9              |
| 121             | 7.293     | 7.3             | 5.81        | 5.7             | 21.1        | 21              | -5        | -5              |
| 120             | 7.228     | 7.255           | 7.5         | 5.65            | 23.4        | 18.8            | -4        | -8              |
| 117             | 7.305     | 7.248           | 6.58        | 6.29            | 24.6        | 20.6            | -2        | -7              |
| 121             | 7.303     | 7.337           | 6.07        | 4.8             | 22.5        | 19.3            | -4        | -7              |
| 117             | 7.286     | 7.287           | 5.73        | 5.64            | 20.5        | 20.2            | -6        | -6              |
| 120             | 7.288     | 7.296           | 5.89        | 4.98            | 21.2        | 18.2            | -5        | -8              |
| 118             | 7.337     | 7.293           | 5.52        | 5.18            | 22.2        | 18.8            | -4        | -8              |
| 119             | 7.284     | 7.332           | 5.28        | 4.37            | 18.8        | 17.4            | -8        | -8              |
| 119             | 7.368     | 7.338           | 4.78        | 5.1             | 20.6        | 20.5            | -5        | -5              |
| 120             | 7.296     | 7.274           | 5.68        | 5.18            | 20.8        | 18              | -6        | -9              |
| 122             | 7.256     | 7.285           | 6.43        | 4.65            | 21.4        | 16.6            | -6        | -10             |
| 13              | 13        | 13              | 13          | 13              | 13          | 13              | 13        | 13              |
| 119.38          | 7.30      | 7.30            | 5.93        | 5.16            | 21.74       | 18.80           | -4.77     | -7.62           |
| 0.45            | 0.01      | 0.01            | 0.19        | 0.16            | 0.44        | 0.41            | 0.44      | 0.45            |
