# Supplementary material for: Characterisation of the Cullin-3 mutation that causes a severe form of familial hypertension and hyperkalaemia
Source: PubMed Central journal article supplement (PMC4604684; doi:10.15252/emmm.201505444), 2015-08-18
Supplement: emmm0007-1285-sd7.pdf [file emmm0007-1285-sd7.pdf]

| 6A          | MBP  |                  | SBP   |                  | DBP  |                  | HR  |                  |
|-------------|------|------------------|-------|------------------|------|------------------|-----|------------------|
|             | mmHg | mmHg             | mmHg  | mmHg             | mmHg | mmHg             | bpm | bpm              |
| Group       | WT   | $\Delta$ 403-459 | WT    | $\Delta$ 403-459 | WT   | $\Delta$ 403-459 | WT  | $\Delta$ 403-459 |
|             | 83.3 | 91.8             | 105.0 | 115.0            | 72.5 | 80.2             | 410 | 538              |
|             | 82.9 | 90.0             | 102.7 | 112.4            | 73.1 | 78.8             | 569 | 570              |
|             | 78.8 | 93.0             | 96.5  | 117.8            | 69.9 | 80.6             | 566 | 541              |
|             | 75.9 | 86.9             | 96.5  | 112.9            | 65.5 | 73.8             | 536 | 485              |
|             | 84.1 | 103.6            | 104.4 | 127.8            | 73.9 | 91.5             | 572 | 534              |
|             | 76.8 | 91.9             | 97.6  | 118.4            | 66.5 | 78.7             | 497 | 440              |
|             | 82.5 | 102.6            | 103.1 | 126.2            | 72.1 | 90.8             | 531 | 503              |
|             | 79.8 | 85.4             | 98.9  | 110.8            | 70.2 | 72.7             | 568 | 492              |
|             | 84.7 | 96.2             | 107.7 | 122.3            | 73.2 | 83.2             | 553 | 473              |
|             | 80.6 | 86.0             | 101.7 | 111.6            | 70.1 | 73.3             | 437 | 397              |
|             | 84.1 | 89.9             | 106.8 | 113.0            | 72.8 | 78.4             | 453 | 497              |
|             | 85.3 | 97.5             | 104.7 | 126.6            | 75.7 | 83.0             | 578 | 417              |
|             | 77.9 | 97.4             | 97.1  | 126.1            | 68.2 | 83.1             | 561 | 475              |
|             | 79.7 | 92.5             | 98.5  | 119.5            | 70.3 | 79.0             | 577 | 451              |
|             | 77.6 | 93.6             | 95.3  | 120.2            | 68.8 | 80.3             | 540 | 425              |
|             | 81.9 | 98.5             | 104.7 | 123.3            | 70.5 | 86.1             | 395 | 561              |
|             | 81.0 | 93.9             | 101.1 | 117.9            | 70.9 | 81.9             | 563 | 505              |
|             | 80.5 | 99.1             | 99.6  | 126.9            | 70.9 | 85.1             | 537 | 463              |
| <b>N</b>    | 18   | 18               | 18    | 18               | 18   | 18               | 18  | 18               |
| <b>mean</b> | 81.0 | 93.9             | 101.2 | 119.4            | 70.8 | 81.1             | 525 | 487              |
| <b>sem</b>  | 0.7  | 1.3              | 0.9   | 1.4              | 0.6  | 1.3              | 15  | 12               |

| 6B       | Aix |                  | AP    |                  | PP   |                  | $\tau_{\text{bourgeois}}$ |                  |
|----------|-----|------------------|-------|------------------|------|------------------|---------------------------|------------------|
|          | %   | %                | mmHg  | mmHg             | mmHg | mmHg             | $\text{s}^{-1}$           | $\text{s}^{-1}$  |
| Group    | WT  | $\Delta$ 403-459 | WT    | $\Delta$ 403-459 | WT   | $\Delta$ 403-459 | WT                        | $\Delta$ 403-459 |
|          | **  | 45               | 10.52 | 15.58            | 32.5 | 34.8             | 0.57                      | 0.60             |
|          | 35  | 38               | 9.79  | 12.68            | 29.6 | 33.6             | 0.63                      | 0.57             |
|          | 37  | 38               | 10.42 | 14.27            | 26.6 | 37.2             | 0.54                      | 0.67             |
|          | 33  | 41               | 9.43  | 15.99            | 31.0 | 39.1             | 0.59                      | 0.64             |
|          | 31  | 45               | 12.25 | 16.52            | 30.5 | 36.3             | 0.64                      | 0.75             |
|          | 39  | 50               | 12.74 | 19.97            | 31.1 | 39.7             | 0.56                      | 0.69             |
|          | 41  | 58               | 12.67 | 20.69            | 31.0 | 35.4             | 0.51                      | 0.70             |
|          | 44  | 50               | 14.18 | 19.12            | 28.7 | 38.2             | 0.72                      | 0.67             |
|          | 41  | 56               | 16.42 | 21.88            | 34.5 | 39.1             | 0.63                      | 0.59             |
|          | 52  | 57               | 17.68 | 21.85            | 31.6 | 38.3             | 0.55                      | 0.62             |
|          | 52  | 53               | 14.21 | 18.43            | 34.0 | 34.7             | 0.58                      | 0.71             |
|          | 49  | 56               | 10.86 | 24.31            | 29.0 | 43.6             | 0.65                      | 0.61             |
|          | 37  | 55               | 12.04 | 23.77            | 28.9 | 43.0             | 0.56                      | 0.64             |
|          | 42  | 50               | 12.00 | 20.65            | 28.2 | 40.9             | 0.62                      | 0.67             |
|          | 45  | 60               | 20.03 | 23.81            | 26.4 | 39.9             |                           |                  |
|          | 58  | 47               | 12.07 | 17.52            | 34.3 | 37.2             |                           |                  |
|          | 40  | 52               | 14.19 | 18.68            | 30.2 | 36.0             |                           |                  |
|          | 49  | 54               | ***   | 22.56            | 28.8 | 41.8             |                           |                  |
| <b>N</b> | 17  | 18               | 17    | 18               | 18   | 18               | 14                        | 14               |

|             |      |      |      |      |      |      |      |      |
|-------------|------|------|------|------|------|------|------|------|
| <b>mean</b> | 42.6 | 50.3 | 13.0 | 19.3 | 30.4 | 38.3 | 0.59 | 0.65 |
| <b>sem</b>  | 1.8  | 1.6  | 0.7  | 0.8  | 0.6  | 0.7  | 0.02 | 0.02 |

6C

## Phenylephrine dose-response curve (MAP response to each dose increme

| Group                                             | WT  | WT  | WT  | WT  | WT  |
|---------------------------------------------------|-----|-----|-----|-----|-----|
| <b>Dose <math>\mu\text{g}/\text{kg}</math> BW</b> |     |     |     |     |     |
| 0.001                                             | *** | *** | 105 | 101 | 108 |
| 0.01                                              | 122 | 108 | 105 | 101 | 108 |
| 0.1                                               | 122 | 106 | 105 | 101 | 107 |
| 0.316                                             | 123 | 109 | 103 | 101 | 108 |
| 1                                                 | 123 | 110 | 107 | 104 | 110 |
| 3.16                                              | 129 | 113 | 112 | 110 | 117 |
| 10                                                | 139 | 122 | 122 | 124 | 124 |
| 31.6                                              | 148 | 131 | 138 | 134 | 136 |
| 100                                               | 166 | 151 | 157 | 155 | 149 |
| 316                                               | 167 | 156 | 158 | 166 | 159 |
| 400                                               | 162 | 156 | *** | 158 | *** |

| Group                                             | $\Delta 403-459$ | $\Delta 403-459$ | $\Delta 403-459$ | $\Delta 403-459$ | $\Delta 403-459$ |
|---------------------------------------------------|------------------|------------------|------------------|------------------|------------------|
| <b>Dose <math>\mu\text{g}/\text{kg}</math> BW</b> |                  |                  |                  |                  |                  |
| 0.001                                             | ***              | ***              | 123              | 119              | 129              |
| 0.01                                              | 115              | 122              | 122              | 118              | 128              |
| 0.1                                               | 118              | 123              | 122              | 117              | 125              |
| 0.316                                             | 118              | 121              | 122              | 124              | 125              |
| 1                                                 | 120              | 123              | 123              | 125              | 130              |
| 3.16                                              | 124              | 129              | 130              | 130              | 140              |
| 10                                                | 133              | 137              | 136              | 138              | 146              |
| 31.6                                              | 144              | 146              | 146              | 152              | 153              |
| 100                                               | 152              | 156              | 168              | 163              | 166              |
| 316                                               | 165              | 170              | 170              | 175              | 179              |
| 400                                               | 161              | 171              | ***              | 178              | 182              |

## Averages

| Group                                             | WT       | WT          | WT         | $\Delta 403-459$ | $\Delta 403-459$ |
|---------------------------------------------------|----------|-------------|------------|------------------|------------------|
| <b>Dose <math>\mu\text{g}/\text{kg}</math> BW</b> | <b>N</b> | <b>mean</b> | <b>sem</b> | <b>N</b>         | <b>mean</b>      |
| 0.001                                             | 13       | 106         | 1.1        | 13               | 124              |
| 0.01                                              | 15       | 107         | 1.4        | 15               | 122              |
| 0.1                                               | 15       | 107         | 1.5        | 15               | 122              |
| 0.316                                             | 15       | 106         | 1.7        | 15               | 122              |
| 1                                                 | 15       | 108         | 1.6        | 15               | 125              |
| 3.16                                              | 15       | 113         | 2.0        | 15               | 131              |
| 10                                                | 15       | 122         | 1.9        | 15               | 140              |
| 31.6                                              | 15       | 135         | 1.8        | 15               | 153              |
| 100                                               | 15       | 151         | 1.7        | 15               | 165              |
| 316                                               | 15       | 160         | 1.5        | 15               | 175              |
| 400                                               | 6        | 160         | 1.7        | 7                | 174              |



nt)

| WT  | WT  | WT  | WT  | WT  | WT  | WT  | WT  |
|-----|-----|-----|-----|-----|-----|-----|-----|
| 105 | 103 | 105 | 114 | 109 | 107 | 108 | 102 |
| 107 | 105 | 105 | 112 | 108 | 106 | 105 | 101 |
| 105 | 105 | 107 | 112 | 111 | 105 | 106 | 99  |
| 105 | 105 | 107 | 113 | 110 | 105 | 106 | 97  |
| 110 | 110 | 108 | 116 | 111 | 105 | 107 | 97  |
| 114 | 115 | 109 | 124 | 114 | 109 | 110 | 99  |
| 122 | 126 | 121 | 135 | 122 | 119 | 119 | 111 |
| 139 | 139 | 130 | 150 | 135 | 131 | 133 | 126 |
| 154 | 152 | 146 | 161 | 150 | 147 | 146 | 149 |
| 158 | 167 | 160 | 172 | 157 | 154 | 152 | 161 |
| *** | 159 | 160 | 167 | *** | *** | *** | *** |

**Δ403-459 Δ403-459 Δ403-459 Δ403-459 Δ403-459 Δ403-459 Δ403-459 Δ403-459**

|     |     |     |     |     |     |     |     |
|-----|-----|-----|-----|-----|-----|-----|-----|
| 130 | 124 | 118 | 128 | 116 | 121 | 131 | 118 |
| 129 | 123 | 119 | 125 | 117 | 121 | 126 | 117 |
| 129 | 125 | 118 | 126 | 116 | 119 | 123 | 117 |
| 131 | 124 | 119 | 126 | 116 | 120 | 129 | 117 |
| 133 | 122 | 125 | 127 | 118 | 121 | 135 | 118 |
| 141 | 133 | 128 | 134 | 124 | 128 | 143 | 123 |
| 156 | 139 | 139 | 145 | 135 | 140 | 156 | 132 |
| 167 | 157 | 147 | 160 | 153 | 151 | 171 | 145 |
| 176 | 165 | 162 | 174 | 170 | 166 | 182 | 163 |
| 188 | 171 | 174 | 180 | 184 | 171 | 190 | 170 |
| 184 | *** | 172 | *** | *** | 171 | *** | *** |

**Δ403-459**

**sem**

1.5  
1.1  
1.1  
1.1  
1.3  
1.6  
2.0  
2.2  
2.2  
2.0  
3.3



**Angiotensin-II (AngII) dose-response curve (SBP response**

| WT  | WT  | Group                | WT    | WT    | WT    | WT    |
|-----|-----|----------------------|-------|-------|-------|-------|
|     |     | <b>Dose µg/kg BW</b> |       |       |       |       |
| 101 | 108 | 0.0001               | 121.3 | 109.7 | 106.3 | 95.72 |
| 101 | 108 | 0.001                | 121.6 | 109   | 103.2 | 92.9  |
| 101 | 105 | 0.01                 | 121.6 | 109.1 | 102.5 | 91.94 |
| 98  | 104 | 0.0316               | 121.8 | 110.1 | 101.5 | 89.43 |
| 100 | 106 | 0.1                  | 129   | 117.8 | 104.7 | 99.74 |
| 102 | 111 | 0.316                | 129.7 | 119.4 | 113.5 | 110.1 |
| 111 | 121 | 1                    | 141.7 | 131.4 | 122.2 | 123.3 |
| 128 | 131 | 3.16                 | 142.1 | 135.2 | 130.9 | 132.4 |
| 145 | 143 | 10                   | 147   | 136.3 | 129.6 | 137.9 |
| 159 | 153 |                      |       |       |       |       |
| *** | *** |                      |       |       |       |       |

| <b>Δ403-459</b> | <b>Δ403-459</b> | <b>Dose µg/kg BW</b> | <b>Δ403-459</b> | <b>Δ403-459</b> | <b>Δ403-459</b> | <b>Δ403-459</b> |
|-----------------|-----------------|----------------------|-----------------|-----------------|-----------------|-----------------|
|                 |                 | 0.0001               | 108.6           | 117.5           | 119.4           | 122.8           |
|                 |                 | 0.001                | 114.5           | 118             | 118.3           | 120.5           |
| 128             | 127             | 0.01                 | 111.7           | 119.9           | 121.2           | 119.2           |
| 127             | 123             | 0.0316               | 118.2           | 119.5           | 119.5           | 121.5           |
| 125             | 123             | 0.1                  | 125.6           | 125.1           | 127.8           | 124.3           |
| 122             | 121             | 0.316                | 123.9           | 129.4           | 135.1           | 131.4           |
| 125             | 123             | 1                    | 133.6           | 144.4           | 143.8           | 135.1           |
| 132             | 126             | 3.16                 | 138.6           | 151             | 148.6           | 141.9           |
| 138             | 135             | 10                   | 147.1           | 155.6           | 150.2           | 143.4           |
| 152             | 146             |                      |                 |                 |                 |                 |
| 163             | 155             |                      |                 |                 |                 |                 |
| 173             | 170             |                      |                 |                 |                 |                 |
| ***             | ***             |                      |                 |                 |                 |                 |

**Averages**

| <b>Group</b>         | <b>WT</b> | <b>WT</b>   | <b>WT</b>  | <b>Δ403-459</b> |
|----------------------|-----------|-------------|------------|-----------------|
| <b>Dose µg/kg BW</b> | <b>N</b>  | <b>mean</b> | <b>sem</b> | <b>N</b>        |
| 0.0001               | 15        | 106         | 2.2        | 15              |
| 0.001                | 15        | 104         | 2.3        | 15              |
| 0.01                 | 15        | 103         | 2.5        | 15              |
| 0.0316               | 15        | 103         | 3.0        | 15              |
| 0.1                  | 15        | 107         | 2.9        | 15              |
| 0.316                | 15        | 113         | 3.0        | 15              |
| 1                    | 15        | 122         | 2.6        | 15              |
| 3.16                 | 15        | 130         | 2.3        | 15              |
| 10                   | 13        | 135         | 2.0        | 14              |



to each dose increment)

| WT    | WT    | WT    | WT    | WT    | WT    | WT    | WT    | WT    |
|-------|-------|-------|-------|-------|-------|-------|-------|-------|
| 112.4 | 109.9 | 104.6 | 107.9 | 116.2 | 112.1 | 108   | 94.26 | 96.9  |
| 109.8 | 109   | 102.2 | 106.6 | 112.2 | 108.2 | 103.7 | 92.94 | 91.88 |
| 110   | 108.2 | 100.3 | 107.3 | 113.8 | 104.2 | 100.6 | 92.39 | 87.39 |
| 109.2 | 107.1 | 99.12 | 105   | 123.1 | 108.6 | 99.23 | 93.02 | 86.71 |
| 113.2 | 112.8 | 103.1 | 104.5 | 122.7 | 110.8 | 103.9 | 97.3  | 92.03 |
| 120.3 | 120.2 | 106.9 | 108.5 | 137.9 | 118.2 | 110.6 | 105.4 | 97.67 |
| 127.2 | 127.2 | 119.3 | 115.7 | 139   | 121.2 | 117   | 117.7 | 108.2 |
| 134.6 | 130.9 | 134.8 | 127.1 | 149.9 | 131.3 | 124.4 | 120.9 | 118   |
| 140.1 | 136.3 | 148.4 |       |       | 132.5 | 129.9 | 134.6 | 125.4 |

| $\Delta 403-459$ | $\Delta 403-459$ | $\Delta 403-459$ | $\Delta 403-459$ | $\Delta 403-459$ | $\Delta 403-459$ | $\Delta 403-459$ | $\Delta 403-459$ | $\Delta 403-459$ |
|------------------|------------------|------------------|------------------|------------------|------------------|------------------|------------------|------------------|
| 128.7            | 135.1            | 125.5            | 123.8            | 130.5            | 111.1            | 123.1            | 135.4            | 121              |
| 121.3            | 130.2            | 125.4            | 119              | 128.6            | 112.4            | 118.2            | 132.8            | 119              |
| 120.9            | 129              | 122.7            | 118              | 127.8            | 112.4            | 117.3            | 131              | 117.7            |
| 121.9            | 128.9            | 129.8            | 118.4            | 130.2            | 113.4            | 116              | 130.7            | 116.7            |
| 132              | 137.2            | 129.1            | 124.4            | 134.2            | 122.3            | 124.8            | 134.6            | 121.3            |
| 140              | 145.5            | 140.4            | 130.3            | 138.6            | 128.4            | 129.8            | 137.4            | 124              |
| 150.2            | 145.5            | 142.3            | 140.2            | 143.5            | 140.4            | 140.4            | 145              | 130.9            |
| 153.2            | 153.7            | 153.6            | 146.3            | 148              | 146.1            | 147.1            | 149.8            | 137.1            |
| 165.1            | 159.1            |                  | 152.9            | 151.3            | 150.8            | 151.2            | 151.5            | 142.4            |

$\Delta 403-459$   $\Delta 403-459$

| mean | sem |
|------|-----|
| 123  | 2.1 |
| 121  | 1.6 |
| 121  | 1.5 |
| 121  | 1.6 |
| 129  | 1.4 |
| 134  | 1.7 |
| 141  | 1.4 |
| 147  | 1.3 |
| 152  | 1.6 |



**WT**      **WT**

|       |       |
|-------|-------|
| 93.75 | 101.9 |
| 91.52 | 101.5 |
| 91.2  | 100.4 |
| 87.39 | 98.06 |
| 92.12 | 100.5 |
| 98.06 | 104.7 |
| 108.9 | 113.3 |
| 118.9 | 124.2 |
| 129.4 | 133.1 |

**Δ403-459** **Δ403-459**

|       |       |
|-------|-------|
| 115.5 | 121.3 |
| 115   | 120.8 |
| 121   | 128.7 |
| 113.2 | 119.8 |
| 129.5 | 137   |
| 130.9 | 137.8 |
| 140.4 | 145.6 |
| 146.4 | 148.3 |
| 152.6 | 154.4 |
