# Supplementary material for: Characterisation of the Cullin-3 mutation that causes a severe form of familial hypertension and hyperkalaemia
Source: PubMed Central journal article supplement (PMC4604684; doi:10.15252/emmm.201505444), 2015-08-18
Supplement: emmm0007-1285-sd8.pdf [file emmm0007-1285-sd8.pdf]

7

|              | <b>Avg -<br/>Media<br/>Thickness</b><br>μm | <b>Avg - Media<br/>Thickness</b><br>μm | <b>Avg -<br/>Elastin<br/>number</b> | <b>Avg -<br/>Elastin<br/>number</b> |
|--------------|--------------------------------------------|----------------------------------------|-------------------------------------|-------------------------------------|
| <b>Group</b> | <b>WT</b>                                  | <b>Δ403-459</b>                        | <b>WT</b>                           | <b>Δ403-459</b>                     |
|              | 93.36                                      | 120.54                                 | 5.07                                | 5.30                                |
|              | 97.39                                      | 137.77                                 | 5.08                                | 5.85                                |
|              | 107.14                                     | 106.71                                 | 5.33                                | 5.48                                |
|              | 107.32                                     | 125.26                                 | 5.11                                | 5.43                                |
|              | 126.17                                     | 132.46                                 | 5.68                                | 5.13                                |
|              | 96.92                                      | 123.34                                 | 5.30                                | 5.26                                |
|              | 91.44                                      | 117.02                                 | 5.21                                | 5.42                                |
|              | 88.40                                      | 133.04                                 | 5.54                                | 5.73                                |
|              | 95.16                                      | 119.90                                 | 4.94                                | 5.35                                |
|              | 93.01                                      | 107.21                                 | 5.38                                | 5.21                                |
|              |                                            | 105.87                                 |                                     | 5.38                                |
| <b>N</b>     | 10                                         | 11                                     | 10                                  | 11                                  |
| <b>mean</b>  | 99.6                                       | 122.3                                  | 5.3                                 | 5.4                                 |
| <b>sem</b>   | 3.7                                        | 3.5                                    | 0.1                                 | 0.1                                 |
